# Supplementary material for: Printed peptide arrays identify prognostic TNC serumantibodies in glioblastoma patients
Source: PubMed Central journal article supplement (PMC4537035; doi:10.18632/oncotarget.3791), 2015-04-12
Supplement: oncotarget-06-13579-s001.pdf [file oncotarget-06-13579-s001.pdf]

## Printed peptide arrays identify prognostic TNC serumantibodies in glioblastoma patients

### Supplementary Material

**Supplemental Table 1:** Clinicopathological characteristics of screening set consisting of 10 long-term and 14 short-term surviving GBM patients. All sera were obtained preoperatively from therapy-naïve patients. Board-certified neuropathologists verified diagnosis of all tumor specimens. The majority of patients received adjuvant radio-chemotherapy. \* $p < 0.05$ , \*\* $p < 0.01$ , \*\*\* $p < 0.001$ .

| Characteristic            | Long-term survivor (LTS) |     | Short-term survivor (STS) |      | p-value     |
|---------------------------|--------------------------|-----|---------------------------|------|-------------|
|                           | No.                      | %   | No.                       | %    |             |
| Case number               | 10                       |     | 14                        |      |             |
| Histological diagnosis    |                          |     |                           |      |             |
| Glioblastoma              | 10                       | 100 | 14                        | 100  |             |
| Age (months)              |                          |     |                           |      |             |
| Median                    | 59                       |     | 63                        |      |             |
| Range                     | 36-67                    |     | 33-81                     |      | 0.371       |
| Gender                    |                          |     |                           |      |             |
| Male                      | 5                        | 50  | 10                        | 71   | 0.403       |
| Female                    | 5                        | 50  | 4                         | 29   |             |
| Treatment                 |                          |     |                           |      |             |
| Surgery                   | 10                       | 100 | 14                        | 100  |             |
| No radio- or chemotherapy | 0                        | 0   | 1                         | 7    |             |
| Chemotherapy only         | 0                        | 0   | 2                         | 14.3 |             |
| Radiotherapy only         | 1                        | 10  | 2                         | 14.3 |             |
| Radio-chemotherapy        | 9                        | 90  | 9                         | 64.3 |             |
| Overall survival (months) |                          |     |                           |      |             |
| Median                    | 58                       |     | 8                         |      | 1.88E-05*** |
| Range                     | 42-185                   |     | 6-10                      |      |             |
| MGMT                      |                          |     |                           |      |             |
| Hypermethylated           | 7                        | 70  | 8                         | 57   | 0.659       |
| Unmethylated              | 2                        | 20  | 4                         | 27   |             |
| Unknown                   | 1                        | 10  | 2                         | 16   |             |
| IDH1                      |                          |     |                           |      |             |
| wild-type                 | 9                        | 90  | 14                        | 100  | 0.417       |
| mutant (132H)             | 1                        | 10  | 0                         | 0    |             |
| KPI                       |                          |     |                           |      |             |
| 100%-90%                  | 6                        | 60  | 12                        | 86   | 0.343       |
| 80%-70%                   | 3                        | 30  | 2                         | 14   |             |
| Unknown                   | 1                        | 10  | 0                         | 0    |             |
| Study Center              |                          |     |                           |      |             |
| Heidelberg                | 10                       | 100 | 14                        | 100  |             |

Abbreviations: KPI = preoperative Karnofsky Performance Index; LTS = long-term survivor; STS = short-term survivor; IDH1 = mutation in isocitrate dehydrogenase 1 (R132H); MGMT = promotor methylation of O-6-methylguanine-DNA methyltransferase. Statistical tests: Student's t-test (age, overall survival), fisher's exact test (gender, MGMT, IDH1, KPI), No. = number of cases

**Supplemental Table 2** : Differential antibody abundance for the Top30 peptides in LTS and STS patients. Peptides are assigned to their corresponding antigen and ordered according to their p-value. A positive log2 fold change (log2 FC) and difference in signal intensity equals a higher titer in LTS patients.

| Peptide         | Antigen | P-Value     | Intensity difference | log2 FC |
|-----------------|---------|-------------|----------------------|---------|
| VCEDGFTGPDCAE   | TNC     | 0.000633244 | 1570.269             | 0.8745  |
| KLICSEKGVSEK    | GLEA2   | 0.00065385  | -611.7965            | -0.578  |
| KETVKLSHEDDHI   | PHF3    | 0.001009832 | 692.643              | 0.5615  |
| VSGNTVEYALTDL   | TNC     | 0.001521112 | 1303.234             | 0.7635  |
| QAHSVLLKKTLDQDQ | PHF3    | 0.003270692 | 566.2445             | 0.4935  |
| TGFLLIQAWPENR   | EGFR    | 0.003687734 | -713.4405            | -0.6515 |
| KKLFGTSGQKTKI   | EGFR    | 0.004568125 | -1066.191            | -0.9985 |
| KVVDCLKFFRKAK   | GLEA2   | 0.004801176 | -1280.414            | -0.8375 |
| EGKYSFGATCVKK   | EGFR    | 0.00611762  | -1535.3945           | -1.0485 |
| KLSHEDDHILEDA   | PHF3    | 0.006157174 | 1806.9675            | 0.8915  |
| KDKEKNKEKKFKE   | GLEA2   | 0.006621059 | -1308.243            | -0.9535 |
| RAGTPYTVTLHGE   | TNC     | 0.006866234 | 888.161              | 0.697   |
| ILKETEFKKIKVL   | EGFR    | 0.007445671 | -903.569             | -0.9175 |
| GEVVVAEVGWDAL   | TNC     | 0.007588535 | 847.007              | 0.5785  |
| LFMRRRHIVRKRT   | EGFR    | 0.007926637 | -3424.9665           | -1.707  |
| ETVNLAWDNEMRV   | TNC     | 0.008115363 | 534.7985             | 0.374   |
| APSQIEVKDVTDT   | TNC     | 0.008284273 | 708.921              | 0.5435  |
| SDFLSNMSMDFQN   | EGFR    | 0.009048923 | -999.5805            | -0.809  |
| NKVEAAQNLTLPG   | TNC     | 0.009790343 | -1240.1265           | -1.0125 |
| GKVKALEEDNLSE   | GLEA2   | 0.010438833 | 1041.3535            | 0.673   |
| NLKDPKNNILFKK   | PHF3    | 0.011974617 | -904.3435            | -0.5075 |
| KSPQENLREPKRK   | GLEA2   | 0.011985668 | -924.8655            | -0.778  |
| ALEEDNLSESSSE   | GLEA2   | 0.01338913  | 1218.787             | 0.6815  |
| PKNNILFKKVLKG   | PHF3    | 0.014111071 | -878.718             | -0.7685 |
| EGGVLLKKVIRHKR  | TNC     | 0.014459747 | -1546.8              | -0.813  |
| YRALMDEEDMDDV   | EGFR    | 0.014666953 | 2564.201             | 0.764   |
| QIVFTHRINIPRR   | TNC     | 0.015208285 | -755.187             | -0.6435 |
| KFSDKEEHEQNSD   | PHF3    | 0.015536046 | 1202.837             | 0.719   |
| ENLQIIRGNMYYE   | EGFR    | 0.0157327   | -1586.7025           | -0.6345 |
| NFYQVKDIRRPER   | PHF3    | 0.016741913 | -1120.506            | -0.7945 |

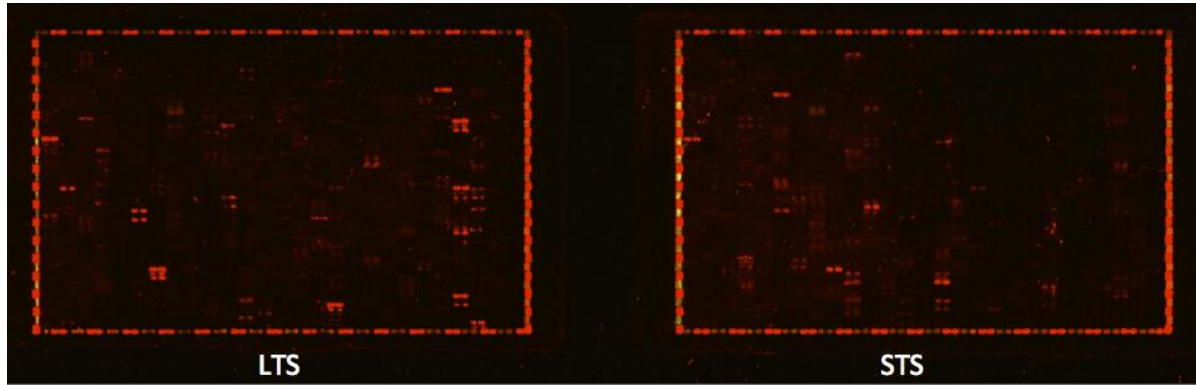

**Supplemental Figure 1:** Representative scans of screening PEPperCHIP® microarray (1745 peptides) for a long-term (LTS) and a short-term surviving (STS) patient. A red fluorescent labeled secondary antibody binding to the human heavy chain visualized patient antibodies specifically bound to spotted peptides on the array. The red spots on the border of the array denote control spots. Duplicate spots within this border depict antibodies against the candidate antigens.

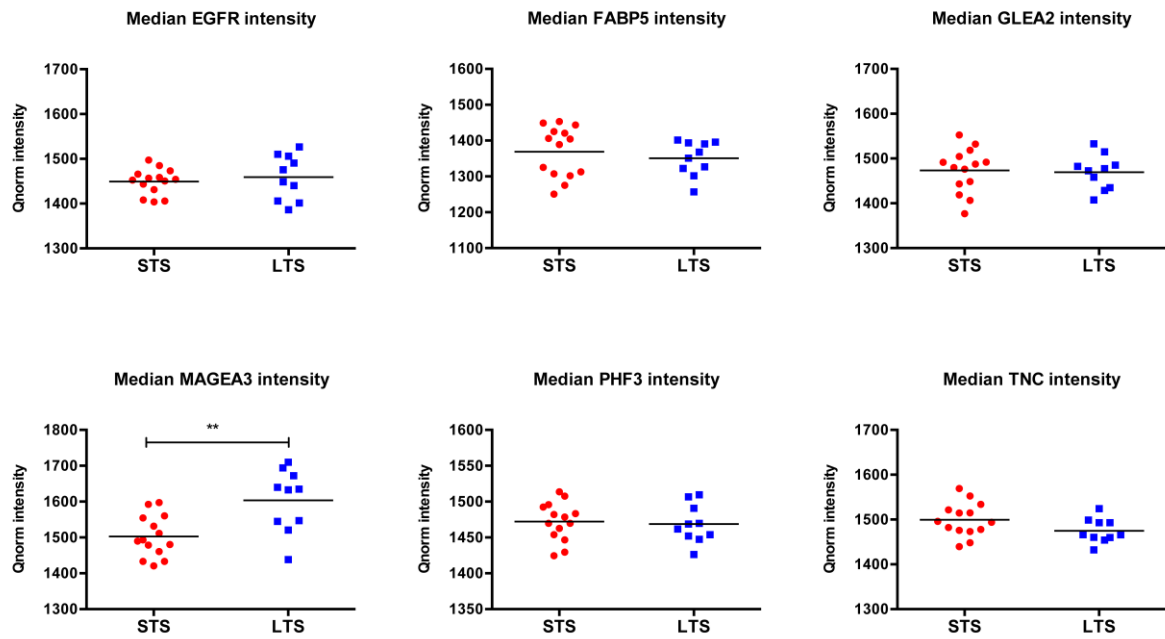

**Supplemental Figure 2 :** Median intensity for all peptides of an antigen on the 1745 PEPperCHIP® screening array. Every scatter plot illustrates the median centered, quantile normalized signal intensity for all peptides of an antigen per patient. Differences between STS and LTS patients are shown. P-values were calculated employing Student's t-test. \* $p < 0.05$ , \*\* $p < 0.01$ , \*\*\* $p < 0.001$ .



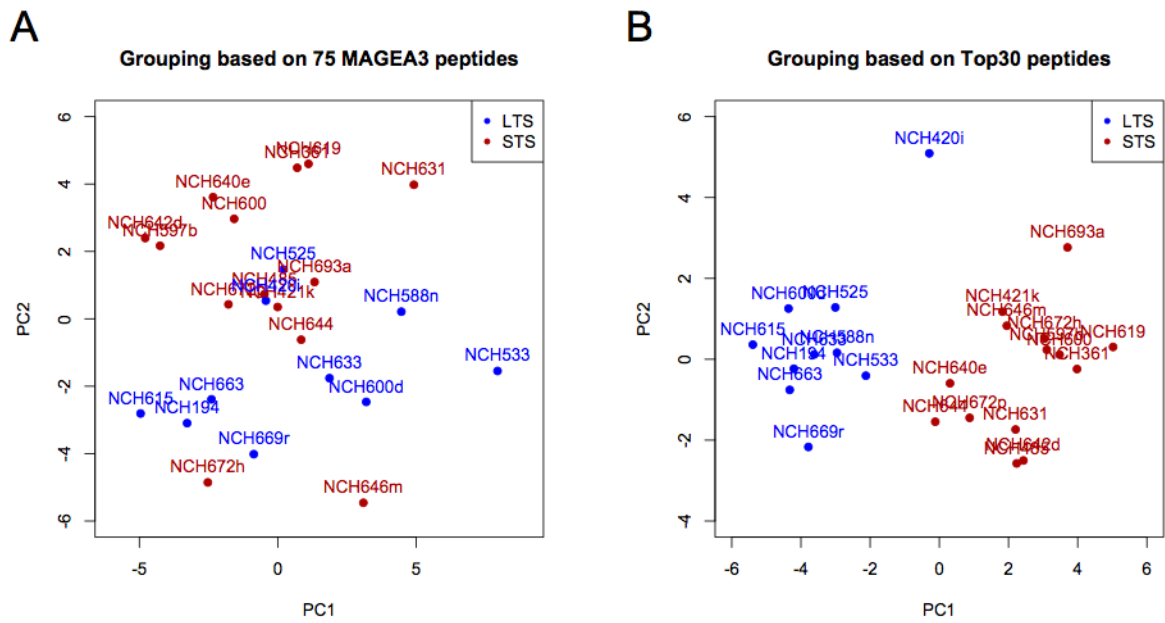

**Supplemental Figure 4.** Principal component analysis visualizing the grouping of LTS and STS patients according to the first and second principal component (PC1, PC2) for (A) all 75 MAGEA3 peptides on the screening array and (B) the Top30 peptides of the comparative analysis. Principal component analysis was performed on median centered, quantile normalized signal intensities of screening arrays.

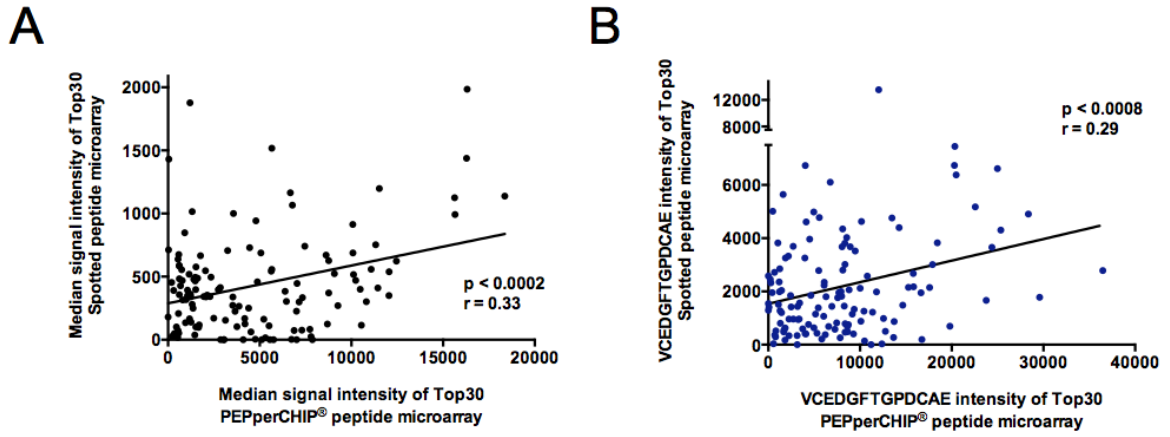

**Supplemental Figure 5:** Correlation between the signal intensities of the Top30 PEPperCHIP® peptide microarray and the Top30 spotted array (pre-synthesized peptides). Correlation of (A) median signal intensities and (B) VCEDGFTGPDCAE intensity for validation set 2 (n=129) are shown. P-values and Pearson's r were calculated using the Pearson correlation coefficient.

## Supplemental Material & Methods

### FASTA sequences of glioblastoma-associated antigens

Top 30 peptides are color-coded in the FASTA sequence. Two pairs of PHF3 peptides were overlapping (yellow and red highlight). The prognostic anti-TNC peptide (VCEDGFTGPDCAE) is highlighted in green.

>sp|Q92576|PHF3\_HUMAN **PHF3** OS=Homo sapiens GN=PHF3 PE=1 SV=3

MDIVDTFNHLIPTEHLDDALFLGSNLENEVCEDFSASQNVLEDSLKNMLSDKDPMLGSASN  
QFCLPVLDSNDPNFQMPNSTVGLDDIMDEGVVKEGNDTIDEELILPNRNLDRKVEENS  
VRSPRKSRLMAQEQVRSRQSTIAKRSNAAPLSNTKKASGKTVSTAKAGVKQPERSQVK  
EEVCMSLKPEYHKENRRCRSRNSGQIEVVPEVSVSSSHSSVSSCLEMKDEGLDSKHKCNN  
PGEIDVPSHELNCSSLSETCVTIGEKKNEALMECKAKPVGSPLF **KFSDKEEHEQNDS** ISGKT  
GETVVEEMIAATRKVEQDS **KETV** **KL** **SHEDD** **HILEDA** GSSDISSDACTNPNTENSLVGLPSC  
VDEVTECNLELKDTMGIADKTENTLERNKIEPLGYCEDAESNRQLESTEFNKSNEVVDST  
FGPESNILENAICDVPDQNSKQLNAIESTKIESHETANLQDDRNSQSSSVSYLESKSVKSKH  
TKPVIHSKQNMTTDAPKKIVAAYEVIHSKTKVNVKSVKRNTDVPESQQNFHRPVKVRKKQI  
DKEPKIQSCNSGVKSVKN **QAHSVLKKT** **LQDQ** TLVQIFKPLTHSLSDKSHAHPGCLKEPHHP  
AQTGHVSHSSQKQCHKPQQAPAMKTNSHVKEELEHPGVEHFKEEDKLKLLKPEKNLQP  
RQRRSSKSFSLDEPPLFIPDNIAIRREGSDHSSSFESKYMWTPSKQCGFCKKPHGNRFMV  
GCGRCDDWFHGDCVGLSLSQAQMGEEDEKEYVVCVCCAEEDKTEILDPTLENQATVE  
FHSGDKTMECEKLGSLKHTTNDRTKYIDDTVKHKVKILKRESGEGRNSSDCRDNEIKKWQL  
APLRKMGQPVLPRRSSEEKSEKIPKESTTVTCTGEKASKPGTHEKQEMKKKKVEKGVNLVH  
PAASASKPSADQIRQSVRHSLKDILMKRLTDSNLKVPEEKAACVATKIEKELFSFFRDTDAKY  
KNKYRSLMF **NLKD** **PKNNIL** **FKKVLK** EVTPDHLIRMSPEELASKELAAWRRRENRTIEMIE  
KEQREVERRPITKITHKGEIEIESDAPMKEQEAAMEIQEPAANKSLEKPEGSEKQKEEVDSM  
SKDTTSQHRQHFLFDLNCKICIGRMAPPVDDLSPKKVKVVGVARHSDNEAESIADALSSTS  
NILASEFFEEEEKQESPSTFSPAPRPEMPGTVEVESTFLARLNFIWKGFINMPSVAKFVTKA  
YPVSGSPEYLTEDLPDSIQVGGRIQPQTVDYVEKIKASGTKEICVVRFTPVTEEDQISYTL  
FAYFSSRKYGVAANNMKQVKDMYLIPLGATDKIPHPLVDFDGPGLHRPNLLLGLIIRQKL  
KRQHSACASTSHIAETPESAPPIALPPDKSKIEVSTEEAPEEENDFFNSFTTVLHKQRNKP  
QQNLQEDLPTAVEPLMEVTKQEPPKPLRFLPGVLIGWENQPTTLELANKPLPVDDILQSLLG  
TTGQVYDQAQSVMEQNTVKEIPFLNEQTNKIEKTDNVEVTDGENKEIKVKVDNISESTDKS  
AEIETSVVGSSSISAGSLTSLSLRGKPPDVSTEAFLTNLSIQSKQEETVESKEKTLKRQLQED  
QENNLQDNQTSNSSPCRSNVGKGNIDGNVSCENLVANTARSPQFINLKRDPRAAGRSQ  
PVTTSESKDGDSCRNGEKHMLPGLSHNKEHLTEQINVEEKLCSAEKNSCVQQSDNLKVAQ  
NSPSVENIQTSQAEQAKPLQEDILMQNIETVHPFRRGSAVATSHFEVGNTPSEFFPSKSITF  
TSRSTSPRTSTNFSMPRPQQPNLQHLKSSPPGFPFPGPPNFPPQSMFGFPPLPPLPP  
PGFGFAQNPMVPWPPVHLPQGPQRMMGPLSQASRYIGPQ **NFYQVKDIRRPER** RHSDP  
WGRQDQQQLDRPFNRGKGRQRFYSDSHHLKRRERHEKEWEQESERHRRRDRSQDKDR  
DRKSREEGHKDKERARLSHGDRGTDGKASRDSRNVDKKPKPKSEDEYKDKEREKSKHR  
EGEKDRDRYHKDRDHTDRTKSKR

>sp|Q9BVI0|PHF20\_HUMAN **GLEA2** OS=Homo sapiens GN=PHF20 PE=1 SV=2

MTKHPPNRRGISFEVGAQLEARDRLKNWYPAHIEDIDYEEGKVLHFKRWNHRYDEWFCW  
DSPYLRLPEKIQLRKEGLHEEDGSSEFQINEQVLACWSDCRFYPAKVAVNKDGTYTVMFY  
DGVVQTVKHIHVKAFSKQNIQVGNARPKETDHKSLSSSPDKREKFKEQRKATVNVKDKED  
KPLKTEKRPKQPDKEG **KLICSEKGVSEK** SLPKNEKEDKENISENDREYSGDAQVDKPKEN  
DIV **KSPQENLREPKRK** RGRPPSIAPTAVDSNSQTLQPITLRRRKISKGCEVPLKRPRLDKN  
SSQEKSKNYSNTDKDLSRRRSSLSTNGTHEILDPLVSDLVDTDPLQDTLSSTKESEE



GQLKSALEAGQVSSALTCHSFGDGSAGLELNCPMSMGENTMKTEPTSPLVELQEISTVEV  
TNTFKKTDDFGSSNAPAVDLDHKFRCKVVVDCLKFFRKAKLLHYHMKYFHGMEKSLEPEESP  
GKRHVQTRGPSASDKPSQETLTRKRVSASSPTTKDKEKNKEKKFKEFVRVKPKKKKKKKK  
KTKPEPCPSEEISDTSQEPSPPKAFVTRCGSSHKPGVHMSPQLHGPESGHHKGVKALE  
EDNLSESSSE SFLWSDDEYQQDQDVTTPDEELDGDDEYDFEVVRCICEVQEENDFMIQC  
EECQCWQHGVCMGLLEENVPEKYTCYVCQDPPGQRPQGFYWDKEWLSRGMHGLAFL  
EENYSHQNAKKIVATHQLLDGVDQRVIEVLHGLQLKMSILQSREHPDLPLWCQPWKQHSGE  
GRSHFRNIPVTDTRSKEEAPSYRTLNGAVEKPRPLALPLPRSVEESYITSEHCYQKPRAYYP  
AVEQKLVVETRGSALDDAVNPLHENGDDSLSPRLGWPLDQDRSKGSDPKPGSPKVKEY  
VSKKALPEEAPARKLLDRGGEGLLSSQHQWQFNLLTHVESLQDEVTHRMSIEKELDVLES  
WLDYTGEELEPEPLARLPQLKHCIKQLLMDLGKVVQIALCCST

>sp|P24821|TENA\_HUMAN **Tenascin C** OS=Homo sapiens GN=TNC PE=1 SV=3

MGAMTQLLAGVFLAFLALATEGGVLLKVIKVRHQRQSGVNATLPEENQPVVFNHVYNIKLPVG  
SQCSVDLESASGEKDLAPPSESESFQEHTVDGENQIVFTHRINIPRACGCAAAPDVKELL  
SRLEELENLVSSLREQCTAGAGCCLQPATGRLDTRPFCSGRGNFSTEGCGCVCEPGWK  
PNCSEPECPGNCHLRGRCIDGQCICDDGFTGEDCSQLACPSDCNDQKCVNGVCICFEGY  
AGADCSREICPVPCEEHGTCVDGLCVCHDGFAGDDCNKPLCLNCCYNRGRVCVENECVC  
DEGFTGEDCSELICPNDCFRGRINGTCYCEEFTGEDCGKPTCPHACHTQGRCEEQ  
CVCDEGFAGVDCSEKRCPADCHNRGRVCVDRCECDDGFTGADCGELKCPNGCSGHGR  
VNGQCVCEGYTGEDCSQLRCPNDCHSRGRVCVEGKCVCEQGFKYDCSDMSPNDCH  
QHGRVCVNGMCVDDGYTGEDCRDRQCPDRCSNRGLCVDGQCVCEDGFTGPDCAELSC  
PNDCHGQGRVCVNGQCVCEGFMGKDCKEQRCPSPDCHGQGRVCVDDGQCICHEGFTGLDC  
GQHSCPSDCNNLGQCVSGRCICNEGYSGEDCSEVSPPKDLVVTEVTEETVNLAWDNEMR  
VTEYLVVYPTTHEGGLEMQFRVPGDQTSTIIQELEPGVEYFIRVFAILENKKSIPIVSARVATYL  
PAPEGLKFKSIKETSVEVEWDPDIAFETWEIIFRNMNKEDEGEITKSLRRPETSYPRTGLAP  
GQEYELSHIVKNNTTRGPGLKRVTTTRLDAPSQIEVKDVTDTTALITWFKPLAEIDGIELTYGK  
DVPGRDRTTIDLTEENQYSIGNLKPDEYEVSLISRRGDMSSNPAKETFTTGLDAPRNLRRV  
SQTDNSITLWRNGKAAIDSYRIKYAPISGGDHAQVDPKSSQATTKTTLTGLRPGTEYGG  
VSAVKEDKESNPATINAATELDTPKDLQVSETAETSLTLLWKTPLAKFDYRLNYSLPTGQW  
VGVQLPRNTTSYVLRGLEPGQEYNVLLTAEKGRHKSAPARVKAQTEQAPLENLTVTEVG  
WDGLRLNWTAAADQAYEHFIIQVQEAANKVEAARNLTVPGSLRAVDIPGLKAATPYTVSIYGI  
QGYRTPVLSAEASTGETPNLGEVVVAEYVGDALKLNWTAPEGAYEYFFIQVQEAQVTEAA  
QNLTVPGGLRSTDLPLGLKAATHYITIRGVTQDFSTTPLSVEVLTEEVPMGNLTVTEVSWD  
ALRLNWTTPDGTQFTIQVQEAQVVEAHNLTVPGLSRMEIPGLRATPYTVTLHGEVR  
GHSTRPLAVEVVTEDLPQLGDLAVSEVGDGLRLNWTAAADNAYEHFVIQVQEVNKVEAAQ  
NLTLPGSLRAVDIPGLEAATPYRVSIYGVIRGYRTPVLSAEASTAKEPEIGNLVSDITPESFN  
LSWMATDGIFETFTIEIIDSRLLETVEYNISGAERTAHISGLPPSTDFIVYLSGLAPSIRTKTIS  
ATATTEALPLLENLTISDINPYGFTVSWMASENAFDSFLVTVVDSGKLLDPQEFTLSGTQRKL  
ELRGLITGIGYEMVSGFTQGHQTKPLRAEIVTEAEPEVDNLLVSDATPDGFRLSWTADEGV  
FDNFVLKIRDTKKQSEPLEITLLAPERTRDITGLREATEYEIELYGISKGRRSQTVSAIATTAM  
GSPKEVIFSDITENSATVSWRAPTAQVESFRITYVPITGGTPSMVTVDGTKTQTRLVKLIPGV  
EYLVSIAMKGFEESEPVSFSTTALDGPSGLVTANITDSEALARWQPAIATVDSYVISYTG  
KVPEITRTVSGNTVEYALTDLEPATEYTLRIFAQKGPQKSSITAKFTTDLDSRPDLTATEVQS  
ETALLTWRPPRASVTGYLLVYESVDGTVKEVIVGPDTSYSLADLSPSTHYTAKIQALNGPL  
RSNMIQTIFTTIGLLYPPFKDCSQAMLNGDTSGLYTIYLNKDKAEELEVFCDMTSDGGGWI  
VFLRRKNGRENFYQNWKAYAAGFGDRREEFWLGLDNLNKITAQQQYELRVDLRDHGETAF  
AVYDKFSVGDATRYKLVKVEGYSGTAGDSMAYHNGRSFSTFDKDTDSAITNCALSYSKGF  
WYRNCHRNVNLMGRYGDNNHSQGVNWFHWKGHEHSIQFAEMKLRPSNFRNLEGRKRRA

>sp|Q01469|FABP5\_HUMAN **FABP5** HUMAN Fatty acid-binding protein, epidermal OS=Homo sapiens GN=FABP5  
PE=1 SV=3

MATVQQLEGRWRLVDSKGFDEYMKELGVGIALRKMAMAKPDCIITCDGKNLTIKTESTLK  
TTQFSTLGEKFEETADGRKTQVCNFTDQALVQHQEWGDKESTITRKLKDGKLVVECV  
MNNVTCTRIYEKVE

>sp|P43357|MAGA3\_HUMAN **MAGEA3** OS=Homo sapiens GN=MAGEA3 PE=1 SV=1

MPLEQRSQHCKPEEGLEARGEALGLVGAQAPATEEQEAASSSSTLVEVTLGEVPAAESPD  
PPQSPQGASSLPTTMNYPLWSQSYEDSSNQEEEEGPSTFPDLESEFQAALSRKVAELVHFL  
LLKYRAREPVTKAEMLGSVVGNWQYFFPVIFSKASSLQLVFGIELMEVDPIGHLIYIFATCLG  
LSYDGLLGDNQIMPKAGLLIIVLAIAREGDCAPEEKIWEELSVLEVFEGREDSILGDPKLLT  
QHFVQENLEYRQVPGSDPACYEFLWGPRLVETS YVVKVLHMHMVKISGGPHISYPPLHEW  
VLREGEE

>sp|P00533|EGFR\_HUMAN **EGFR** OS=Homo sapiens GN=EGFR PE=1 SV=2

MRPSGTAGAALLALLAALCPASRALEEKKVCQGTSNKLTLQGLTFEDHFLSLQRMFNCEV  
LGNLEITYVQRNYDLSFLKTIQEVAGYVLIANTVERIPL **ENLQIIRGNMYE**NSYALAVLSNY  
DANKTGLKELPMRNLQEILHGAVRFSNNPALCNVESIQWRDIVS **SDFLSNMSMDFQN**HLGS  
CQKCDPSCPNGSCWGAGEENCQKLTKIIAQQCSGRCRGKSPSDCCHNQCAAGCTGPR  
ESDCLVCRKFRDEATCKDTCPLMLYNPTTYQMDVNP **EGKYSFGATCVKK**CPRNYVVDH  
GSCVRACGADSYEMEEDGVRKCKKCEGPCRKVCNGIGIGEFKDSLSINATNIKHFKNCT  
GDLHILPVAFRGDSFHTHTPPLDPQELDILKTVKEI **TGFLLIQAWPENR**TDLHAFENLEIIRGRT  
KQHGQFSLAVVSLNITSLGLRSLKEISDGDVVISGNKNLCYANTINW **KKLFGTSGQKTKI**ISNR  
GENSCKATGQVCHALCSPEGCWGPEPRDCVSCRNVSRGRECVDKCNLLEGEPREFVENS  
ECIQCHPECLPQAMNITCTGRGPDNCIQCAHYIDGPHCVKTCPAGVMGENNTLVWKYADA  
GHVCHLCHPNCTYGCTGPGLEGCPNGPKIPSATGMVGALLLLLVVALGIG **LFMRRRHIVR**  
**KRT**LRLLQERELVEPLTPSGEAPNQALLR **ILKETEFKKIKVL**GSGAFGTVYKGLWIPEGEKV  
KIPVAIKELREATSPKANKEILDEAYVMASVDNPHVCRLGICLTSTVQLITQLMPFGCLLDYV  
REHKDNIGSQYLLNWCVQIAKGMNYLEDRLVHRDLAARNVLVKTQHVKITDFGLAKLLG  
AEEKEYHAEGGKVPKWMMALESILHRIYTHQSDVWSYGVTVWELMTFGSKPYDGIPASEISS  
ILEKGERLPQPPICTIDVYIMVVKCWMIDADSRPKFRELIIEFSKMARDPQRYLVIQGD  
LPSPTDSNF **YRALMDEEDMDDV**VDADEYLIPQQGFFSSPSTSRTPLLSSLSATSNNSTVACI  
DRNGLQSCPIKEDSFLQRYSSDPTGALTEDSIDDTFLPVPEYINQSVPKRPAGSVQNPVYHN  
QPLNPAPSRDPHYQDPHSTAVGNPEYLN TVQPTCVNSTFDSPAHWQAQKGS HQISLDNPDY  
QQDFFPKEAKPNGIFKGSTAENA EYLRVAPQSSEFIGA
